# Supplementary material for: In situ room temperature synthesis of a polyaniline–gold–titanium(iv) dioxide heteronanojunction system
Source: Royal Society of Chemistry journal article supplement (doi:10.1039/c2cc37172c), 2012-11-21
Supplement: c2cc37172c.pdf [file c2cc37172c.pdf]

# In-Situ Room Temperature Synthesis of Polyaniline-Gold-Titanium(IV) Dioxide Heteronanojunction System

Yukihide Kitamura,<sup>a</sup> Tadahiro Niwa,<sup>a</sup> Shin-ichi Naya,<sup>b</sup> Takanori Hattori,<sup>c</sup> Yasutaka Sumida,<sup>c</sup>  
Hiroaki Tada<sup>a,b \*</sup>

<sup>a</sup> *Department of Applied Chemistry, School of Science and Engineering, Kinki University, 3-4-1, Kowakae, Higashi-Osaka, Osaka 577-8502, Japan*

<sup>b</sup> *Environmental Research Laboratory, Kinki University, 3-4-1, Kowakae, Higashi-Osaka, Osaka 577-8502, Japan*

<sup>c</sup> *Advanced Materials Research Center, Nippon Shokubai Co. Ltd., 5-8, Nishi Otabi-cho, Suita, Osaka 564-8512, Japan*

\* To whom correspondence should be addressed: TEL: +81-6-6721-2332, FAX: +81-6-6727-2024,

E-mail: [h-tada@apch.kindai.ac.jp](mailto:h-tada@apch.kindai.ac.jp).

## Experimental details

### Aniline polymerization on Au/TiO<sub>2</sub>

A paste containing anatase TiO<sub>2</sub> particles (PST-18NR, Nikki Syokubai Kasei) was coated on ITO film-coated glass substrates ( $< 10 \Omega/\square$ , Geomatec) by a squeegee method, and the sample was heated in air at 773 K for 1 h to form mp-TiO<sub>2</sub> film-coated electrode. Au particles were loaded on anatase TiO<sub>2</sub> particles (A-100, Ishihara Sangyo) or mp-TiO<sub>2</sub> (Au/mp-TiO<sub>2</sub>) by the DP method using HAuCl<sub>4</sub> as a starting material.<sup>[16]</sup> Au/TiO<sub>2</sub> (1 g) or Au/mp-TiO<sub>2</sub> (25 mm  $\times$  30 mm) was added to a 0.5 mol dm<sup>-3</sup> H<sub>2</sub>SO<sub>4</sub> solution of 0.1 mol dm<sup>-3</sup> aniline and H<sub>2</sub>O<sub>2</sub> (250 mL for Au/TiO<sub>2</sub> or 100 mL for Au/mp-TiO<sub>2</sub>), and the suspension was stirred at 298 K in the dark. After reaction, the

particles were recovered by centrifugation, and the resulting particles were washed with H<sub>2</sub>O three times to be dried under vacuum.

### Sample characterization

TEM observation was carried out at an applied voltage of 300 kV (JEM-3010, JEOL). The loading amount of Au was quantified by inductively coupled plasma spectroscopy (ICPS-7500, Shimadzu). The amount of PANI was determined by TG-DTA (DTG-60, Shimadzu), in which the samples were heated up to 1073 K at a rate of 20 K min<sup>-1</sup> in air. UV-Vis diffuse reflectance spectra were recorded on a Hitachi U-4000 spectrophotometer. The spectra were converted to the absorption spectra by using the Kubelka-Munk function. X-ray photoelectron spectroscopic (XPS) measurements were performed using a Kratos Axis Nova X-ray photoelectron spectrometer with a monochromated Al K<sub>α</sub> X-ray source ( $h\nu = 1486.6$  eV) operated at 15 kV and 10 mA. The take-off angle was 90°, and multiplex spectra were obtained for Au4f, C1s, N1s, and S2p photopeaks. All the binding energies were referenced with respect to the C1s at 284.6 eV. Diffuse reflectance infrared Fourier transform (DRIFT) spectra of the samples were obtained with a JASCO FT/IR-470Plus spectrometer equipped with a diffuse reflectance attachment.

### Photoluminescence measurements

One hundred mL of a solution of terephthalic acid ( $1 \times 10^{-4}$  mol dm<sup>-3</sup>) and H<sub>2</sub>SO<sub>4</sub> (0.5 mol dm<sup>-3</sup>) was prepared by diluting a mixture of a dimethylformamide solution of terephthalic acid and a H<sub>2</sub>SO<sub>4</sub> solution with water. After 0.1 mL of H<sub>2</sub>O<sub>2</sub> (10 mol dm<sup>-3</sup>), and then Au/TiO<sub>2</sub> (0.4 g) were added the solution, the suspension was stirred at 298 K. Photoluminescence spectra of the solutions were measured with an excitation wavelength of 315 nm at room temperature using a JASCO FP-6000 spectrofluorometer. For comparison, the spectra of the same solutions without Au/TiO<sub>2</sub> were also measured.

### Electrochemical measurements

Cyclic voltammograms were measured in a  $0.1 \text{ mol dm}^{-3} \text{ H}_2\text{SO}_4$  solution under deaerated conditions using PANI/Au/mpTiO<sub>2</sub> as working electrode in a regular three-electrode electrochemical cell using a galvanostat/potentiostat (HZ-5000, Hokuto Denko). Glassy carbon and Ag/AgCl were used as counter electrode and reference electrode, respectively.

### Quantum chemical calculations

The quantum chemical calculations were performed based on density functional theory (DFT) at the B3LYP/6-31+G level as implemented in Gaussian09.

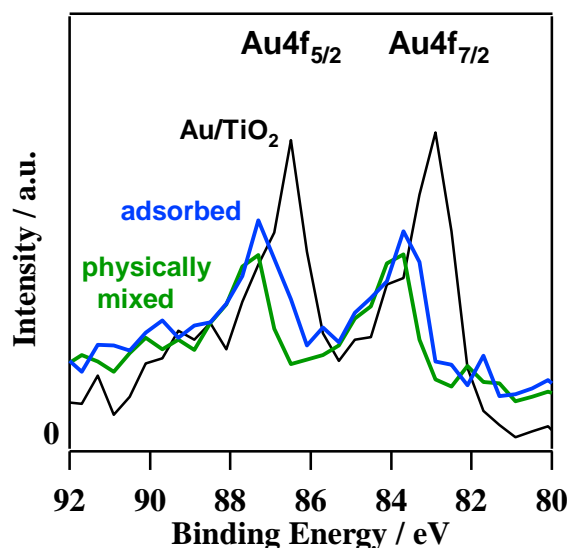

**Fig. S1** XPS spectra of Au 4f of Au/TiO<sub>2</sub> samples with physically mixed (green) and adsorbed (blue) with authentic PANI and Au/TiO<sub>2</sub> (black).

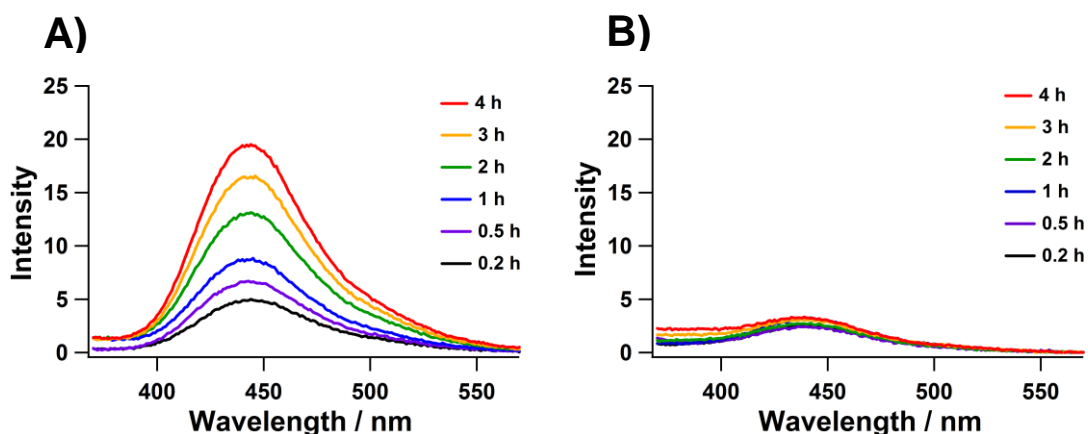

**Fig. S2** Photoluminescence spectra of a  $\text{H}_2\text{SO}_4$  solution containing  $\text{H}_2\text{O}_2$  and terephthalic acid ( $\sim 1 \times 10^{-4} \text{ mol dm}^{-3}$ ) in the presence (A) and absence (B) of Au/TiO<sub>2</sub>.

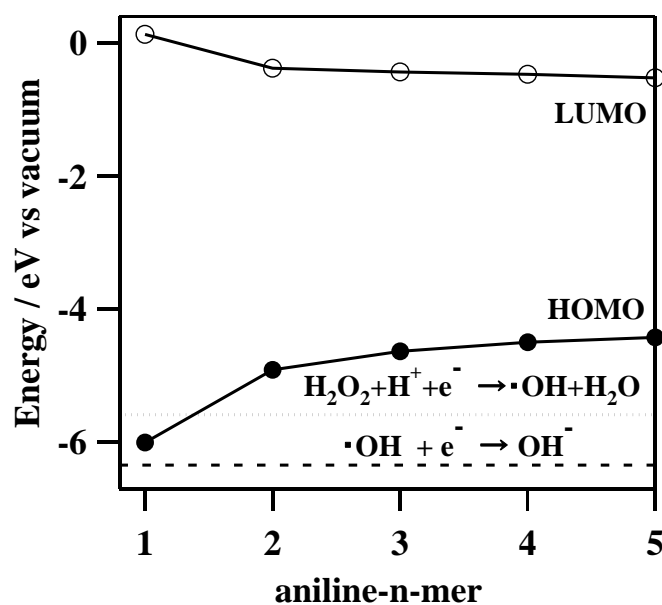

**Fig. S3** HOMO energy of aniline  $n$ -mers as a function of  $n$ . The reduction potentials of  $\text{H}_2\text{O}_2$  ( $\text{H}_2\text{O}_2 + \text{H}^+ + \text{e}^- \rightarrow \cdot\text{OH} + \text{H}_2\text{O}$ ) and  $\cdot\text{OH}$  radical ( $\cdot\text{OH} + \text{H}^+ + \text{e}^- \rightarrow \text{H}_2\text{O}$ ) were cited from Refs. 1 and 2, respectively. The standard hydrogen electrode potential was set -4.5 eV with respect to the vacuum level (Ref. 3)

## References

- 1 *Denki Kagaku Binran*, Electrochemistry of Japan, Maruzen, Tokyo, 2000.
- 2 Y. Nosaka and A. Nosaka, *Nyumon Hikarisyokubai (Introduction to Photocatalysts)*, Tokyo Tosyo, Tokyo, 2004.
- 3 R. Memming, *Semiconductor Electrochemistry*, Wiley-VCH, Weinheim, 2001.

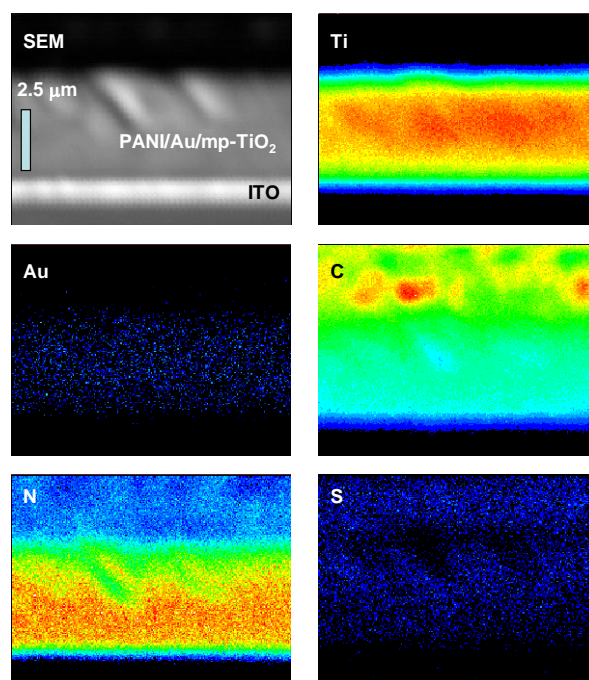

**Fig. S4** SEM image, Ti, Au, C, N, S-elemental depth profiles for the cross-section for in-situ PANI/Au/mp-TiO<sub>2</sub>.
